# Supplementary material for: Taxonomic Review of the Genus Caloptilia Hübner, 1825 (Lepidoptera: Gracillariidae) with Descriptions of Three New Species and Seven Newly Recorded Species from Korea
Source: MDPI journal article supplement (doi:10.3390/insects13121107), 2022-11-30
Supplement: s1 [file s1]

**Supplementary Material Table S1. Host plants of the Korean *Caloptilia* species.**

| Subfamily      | Species                          | Host plants              |
|----------------|----------------------------------|--------------------------|
| Gracillariinae | <i>Caloptilia acericola</i>      | Sapindaceae              |
| Gracillariinae | <i>Caloptilia aceris</i>         | Sapindaceae              |
| Gracillariinae | <i>Caloptilia alni</i>           | Betulaceae               |
| Gracillariinae | <i>Caloptilia azaleella</i>      | Ericaceae                |
| Gracillariinae | <i>Caloptilia celtidis</i> *     | Cannabaceae†             |
| Gracillariinae | <i>Caloptilia chrysolampra</i>   | Salicaceae               |
| Gracillariinae | <i>Caloptilia dentata</i>        | Sapindaceae              |
| Gracillariinae | <i>Caloptilia hidakensis</i>     | Sapindaceae              |
| Gracillariinae | <i>Caloptilia kadsurae</i> *     | Magnoliaceae†            |
| Gracillariinae | <i>Caloptilia kisoensis</i>      | Sapindaceae              |
| Gracillariinae | <i>Caloptilia leucothoes</i>     | Ericaceae                |
| Gracillariinae | <i>Caloptilia magnoliae</i> *    | Lauraceae†, Magnoliaceae |
| Gracillariinae | <i>Caloptilia mandschurica</i> * | Fagaceae†                |
| Gracillariinae | <i>Caloptilia monticola</i>      | Sapindaceae              |
| Gracillariinae | <i>Caloptilia pulverea</i>       | Betulaceae               |
| Gracillariinae | <i>Caloptilia pyrrhaspis</i> *   | Betulaceae†              |
| Gracillariinae | <i>Caloptilia recitata</i>       | Anacardiaceae            |
| Gracillariinae | <i>Caloptilia rhois</i>          | Anacardiaceae            |
| Gracillariinae | <i>Caloptilia sapporella</i>     | Fagaceae                 |
| Gracillariinae | <i>Caloptilia schisandrae</i>    | Magnoliaceae             |
| Gracillariinae | <i>Caloptilia soyella</i> *      | Fabaceae†                |
| Gracillariinae | <i>Caloptilia stigmatella</i>    | Salicaceae               |
| Gracillariinae | <i>Caloptilia theivora</i> *     | Theaceae†                |
| Gracillariinae | <i>Caloptilia yasudai</i>        | Unknown                  |
| Gracillariinae | <i>Caloptilia zachrysa</i>       | Rosaceae                 |
| Gracillariinae | <i>Caloptilia koreana</i>        | Unknown                  |
| Gracillariinae | <i>Caloptilia purpureus</i> *    | Rhamnaceae†              |
| Gracillariinae | <i>Caloptilia xanthos</i>        | Unknown                  |

(\*: rearing from host plants, †: new record of host plants)
