# Supplementary material for: Taxonomic Review of the Genus Caloptilia Hübner, 1825 (Lepidoptera: Gracillariidae) with Descriptions of Three New Species and Seven Newly Recorded Species from Korea
Source: MDPI journal article supplement (doi:10.3390/insects13121107), 2022-11-30
Supplement: s1 [file s1]

## Supplementary Material 2. Annotated checklist for the Korean *Caloptilia* species

Order **LEPIDOPTERA** Linnaeus, 1758

Superfamily **GRACILLARIOIDEA** Stainton, 1854

Family **GRACILLARIIDAE** Stainton, 1854

Gracillariidae Stainton, 1854. Insecta Britannica, Lepidoptera, Tineina: 193.

Type genus: *Gracillaria* Haworth, 1828.

Genus *Caloptilia* Hübner, 1825

*Caloptilia* Hübner, 1825: 427.

Type species: *Tinea upupaepennella* Hübner, 1796.

*Antiolopha* Meyrick, 1864.

*Calliptilia* Agassiz, 1847.

*Cecidoptilia* Kumata, 1982.

*Coriscium* Zeller, 1839.

*Minyoptylia* Kumata, 1982.

*Ornix* Treitschke, 1833.

*Ornix* Kollar, 1832.

*Phylloptilia* Kumata, 1982.

*Poeciloptilia* Hübner, 1825.

*Rhadinoptilia* Kumata, 1982.

*Sphyrophora* Vári, 1961.

*Timodora* Meyrick, 1886.

### 1. *Caloptilia acericola* Kumata, 1966 긴노랑가는나방

*Caloptilia acericola* Kumata, 1966: 2-3. TL: Hokkaidō, Japan. TD: EIHU (Holotype; Paratypes).

**Distribution.** Korea (new record), Japan, Russia.

**Host plants.** *Acer japonicum* Thunb., *A. palmatum* Thunb., *A. pictum* Thunb. ex Murray, *A. pseudosieboldianum* (Pax) Kom. [Sapindaceae].

### 2. *Caloptilia aceris* Kumata, 1966 단풍잎가는나방

*Caloptilia aceris* Kumata, 1966: 1. TL: Hokkaido, Japan. TD: EIHU (Holotype; Paratypes).

**Distribution.** Korea, China, Japan, Russia.

**Host plants.** *Acer miyabei* Maxim., *A. palmatum* Thunb., *A. pictum* Thunb. ex Murray, *A. saccharum* Marschall [Sapindaceae]

### 3. *Caloptilia alni* Kumata, 1966 오리나무가는나방

*Caloptilia alni* Kumata, 1966: 12. TL: Hokkaidō, Japan. TD: EIHU (Holotype; Paratypes).

**Distribution.** Korea, China, Japan, Russia.

**Host plants.** *Alnus hirsuta* Turcz., *A. japonica* (Thunb.) Steud. [Betulaceae].

### 4. *Caloptilia azaleella* (Brants, 1966) 산철쭉가는나방

*Gracillaria azaleella* Brants, 1966: lxx–lxii. TL: Japan. TD: Unknown.

*Gracillaria anthracosperma* Meyrick, 1931.

*Gracillaria azaleae* Busck, 1914.

**Distribution.** Korea, China, Japan, Russia, Australia, New Zealand, Austria, Belgium, Czech Republic, Denmark, Finland, France, Germany, Hungary, Ireland, Italy, Luxembourg, Netherlands, Norway, Poland, Portugal, Slovakia, Sweden, Switzerland, United Kingdom, Canada, United States, South Africa.

**Host plants.** *Rhododendron yedoense* var. *poukhanense*, *R. decandrum* Makino, *R. indicum* (L.) Sweet, *R. kaempferi* Planch, *R. kiusianum* Makino, *R. macrosepalum* Maxim. *R. viscistylum*, *R. simsii* Planch., *R. japonicum* Sur., *R. obtusum* (Lindl.) Planch, *R. sp.*, *Azalea* sp. [Ericaceae].

### 5. *Caloptilia celtidis* Kumata, 1982 흰무늬가는나방

*Caloptilia celtidis* Kumata, 1982: 76–79. TL: Honshū, Japan. TD: EIHU (Holotype); EIHU, BMNH (Paratypes).

**Distribution.** Korea (new record), China, Hong Kong, Japan.

**Host plants.** *Celtis sinensis* Persoon, *C. jessoensis* Koidz. [Cannabaceae].

**Remarks.** This species reared from *Celtis sinensis* Persoon of the family Cannabaceae in this study.

### 6. *Caloptilia chrysolampra* (Meyrick, 1938) 버들가는나방

*Gracillaria chrysolampra* Meyrick, 1936: 38. TL: Taiwan. TD: BMNH (Syntypes).

**Distribution.** Korea, China, Japan, Taiwan.

**Host plants.** *Salix pseudo-lasiopyne*, *S. babylonica* L., 1753, *S. sp.*, *Populus nigra* L., *P. nigra* L. [Salicaceae].

### 7. *Caloptilia dentata* Liu & Yuan, 1990 네모무늬가는나방

*Caloptilia (Caloptilia) dentata* Liu & Yuan, 1990: 186. TL: Beijing, China. TD: IZAS (Holotype; Paratypes).

**Distribution.** Korea (new record), China.

**Host plants.** *Acer truncatum* Bunge [Sapindaceae].

**8. *Caloptilia hidakensis* Kumata, 1966 고로쇠가는나방**

*Caloptilia hidakensis* Kumata, 1966: 4. TL: Hokkaidō, Japan. TD: EIHU (Holotype; Paratype).

**Distribution.** Korea, Japan, Russia.

**Host plants.** *Acer pictum* Thunb. ex Murray [Sapindaceae]

**9. *Caloptilia kadsurae* Kumata, 1966 남오미자가는나방**

*Caloptilia kadsurae* Kumata, 1966: 19. TL: Honshū, Japan. TD: EIHU (Holotype; Paratypes).

**Distribution.** Korea (new record), Japan.

**Host plants.** *Kadsura japonica* Dunal [Magnoliaceae].

**Remarks.** This species reared from *Kadsura japonica* Dunal of the family Magnoliaceae in this study.

**10. *Caloptilia kisoensis* Kumata, 1982 신나무가는나방**

*Caloptilia (Caloptilia) kisoensis* Kumata, 1982: 45-47. TL: Honshū, Japan. TD: EIHU (Holotype; Paratypes).

**Distribution.** Korea, Japan, Russia.

**Host plants.** *Acer ginnala* Maxim., *A. pictum* Thunb. ex Murray [Sapindaceae].

**11. *Caloptilia koreana* Kim and Byun, 2022 한국가는나방**

*Caloptilia koreana* Kim and Byun, 2022. TL: Gwangneung, Korea. TD: HNUSEL (Holotype).

**Distribution.** Korea (endemic).

**Host plants.** Unknown.

**12. *Caloptilia leucothoes* Kumata, 1982 산진달래가는나방**

*Caloptilia (Caloptilia) leucothoes* Kumata, 1982: 68 [2]. TL: Hokkaido, Japan. TD: EIHU (Holotype), EIHU, BMNH (Paratypes).

**Distribution.** Korea, Japan, Russia.

**Host plants.** *Leucothoe grayana* Maxim., *Rhododendron albrechti* Maxim., *R. dauricum* L., *R. dilatatum* Miq., *R. reticulatum* D. Don, *R. sp.*, *Menziesia pentandra* Maxim. [Ericaceae].

**13. *Caloptilia magnoliae* Kumata, 1966 목련가는나방**

*Caloptilia magnoliae* Kumata, 1966: 17 [17]. TL: Hokkaido, Japan. TD: EIHU (Holotype; Paratypes).

**Distribution.** Korea, Japan.

**Host plants.** *Machilus thunbergii* Siebold & Zucc. [Lauraceae], *Magnolia* sp., *M. kobus* DC [Magnoliaceae].

#### 14. *Caloptilia mandschurica* (Christoph, 1882) 북방민가는나방

*Gracillaria mandschurica* Christoph, 1882: 39-40. TL: Russia. TD: BMNH (Holotype; Allotype).

*Caloptilia (Caloptilia) mongolicae*: Kumata, 1982.

**Distribution.** Korea, China, Japan, Russia.

**Host plants.** *Quercus mongolica* subsp. *crispula* (Blume), *Castanea crenata* Siebold & Zucc., *Q. acutissima* Carruth., *Q. dentata* Thunb., *Q. crispula* Blume, *Q. serrata* Thunb. [Fagaceae].

**Remarks.** This species reared from *Quercus mongolica* subsp. *crispula* (Blume) of the family Fagaceae in this study.

#### 15. *Caloptilia monticola* Kumata, 1966 외반점가는나방

*Caloptilia monticola* Kumata, 1966: 8. TL: Honshu, Japan. TD: EIHU (Holotype; Paratypes).

**Distribution.** Korea (new record), China, Japan, Russia.

**Host plants.** *Acer argutum* Maxim., *A. ginnala* Maxim., *A. pentaphyllum* Diels., *A. pictum* Thunb. ex Murray, *A. rufigerum* Siebold & Zucc., *A. semenovii* Regel & Herd, *A. ukurunduense* Trautv. & Mey., *A. distylum* Siebold & Zucc., *A. micranthum* Siebold & Zucc., *A. tschonoskii* Maxim., *A. ukurunduense* Trautv. & Mey., *A. semenovii* Regel & Herd, *A. sp.* [Sapindaceae].

#### 16. *Caloptilia pulverea* Kumata, 1966 흑갈색점가는나방

*Caloptilia pulverea* Kumata, 1966:13 [17]. TL: Hokkaido, Japan. TD: EIHU (Holotype), EIHU, BMNH (Paratypes).

**Distribution.** Korea, China, Japan, Russia.

**Host plants.** *Alnus hirsuta* Turcz., *A. japonica* (Thunb.) Steud., *A. matsumurae* Callier, *A. maximowiczii* Callier, *A. rugosa* (Du Roi) Spreng. *A. firma* Siebold & Zucc., *A. serratuloides* Callier [Betulaceae].

#### 17. *Caloptilia purpureus* Kim and Byun, 2022 보라가는나방

*Caloptilia purpureus* Kim and Byun, 2022. TL: Yeosu, Korea. TD: HNUSEL (Holotype).

**Distribution.** Korea (endemic).

**Host plants.** *Sageretia theezans* (L.) Brongn. [Rhamnaceae].

**Remarks.** This species reared from *Sageretia theezans* (L.) Brongn. of the family Rhamnaceae in this study.

**18. *Caloptilia pyrrhaspis* (Meyrick, 1931) 반무늬가는나방**

*Gracillaria pyrrhaspis* Meyrick, 1931: 17. TL: Szechuan, China. TD: BMNH (Holotype).

*Caloptilia bicolor* Ermolaev, 1977: 105, 110.

*Caloptilia pyrrhaspis*: Kumata, 1982: 74.

**Distribution.** Korea, China, Japan, Russia.

**Host plants.** *Betula davurica* Pall., *B. ermanii* Chamisso, *B. grossa* Siebold & Zucc., *B. dahurica* Pall., *B. platyphylla* Sukaczew [Betulaceae].

**Remarks.** This species reared from *Betula davurica* Pall. of the family Betulaceae in this study.

**19. *Caloptilia recitata* (Meyrick, 1918) 큰갈색무늬가는나방**

*Gracillaria recitata* Meyrick, 1918b: 178-179. TL: Assam, India. TD: BMNH (Syntypes).

*Caloptilia recitata*: Issiki, 1957: 30.

**Distribution.** Korea (new record), China, Hong Kong, Japan, India, Nepal.

**Host plants.** *Cotinus coggygia* Scop., *Rhus javanica* L., *Toxicodendron sylvestre* (Siebold & Zucc.) Kuntze, *T. trichocarpum* (Miq.) Kuntze in China [Anacardiaceae].

**Remarks.** This species collected from *Ailanthus altissima* (Mill.) [Simaroubaceae] with pupal cocoon on the back side.

**20. *Caloptilia rhois* Kumata, 1982 옷나무가는나방**

*Caloptilia (Caloptilia) rhois* Kumata, 1982: 62-65. TL: Honshu, Japan. TD: EIHU (Holotype; Paratypes).

**Distribution.** Korea, China, Japan, Hong Kong.

**Host plants.** *Rhus javanica* L., *Toxicodendron succedaneum* (L.) Kuntze [Anacardiaceae].

**21. *Caloptilia sapporella* (Matsumura, 1931) 졸참나무가는나방**

*Gracillaria sapporella* Matsumura, 1931: 1101. TL: Japan. TD: EIHU (Syntype).

*Caloptilia illicii* Kumata, 1966: Shin et al., 2015 (misidentification).

**Distribution.** Korea, China, Japan, Russia.

**Host plants.** *Quercus acutissima* Carruth., *Castanea crenata* Siebold & Zucc., *Q. dentata* Thunb., *Q. mongolica* subsp. *crispula* (Blume) Menitsky, *Q. serrata* Thunb., *Q. crispula* Blume [Fagaceae].

**22. *Caloptilia schisandrae* Kumata, 1966 오미자가는나방**

*Caloptilia schisandrae* Kumata, 1966: 18. TL: Hokkaido, Japan. TD: EIHU (Holotype; Paratypes).

**Distribution.** Korea, China, Japan, Russia.

**Host plants.** *Schisandra chinensis* Baill. [Magnoliaceae].

### 23. *Caloptilia soyella* (van Deventer, 1904) 톱니가는나방

*Gracillaria soyella* van Deventer, 1904: 22-25. TL: Java, Indonesia. TD: RNHL (Lectotype; Paralectotype).

*Caloptilia soyella*: Issiki, 1950: 451.

**Distribution.** Korea (new record), China, Japan, India, Indonesia, Viet Nam, Fiji, Cape Verde.

**Host plants.** *Lespedeza cyrtobotrya* Miq. [Fabaceae], *Cajanus cajan* (L.) Millsp., *Glycine max* (L.) Merr., *Kummerovia striana* Schindler, *Phaseolus mungo* L., *Vigna angularis* (Willd.) Ohwi & H. Ohashi, *P. calcaratus* Roxb., *Soya hispida* Moench [Fabaceae].

**Remarks.** This species reared from *Lespedeza cyrtobotrya* Miq. of the family Fabaceae in this study.

### 24. *Caloptilia stigmatella* (Fabricius, 1781) 백양나무가는나방

*Tinea stigmatella* Fabricius, 1781: 295-296 . TL: United Kingdom. TD: GLAHM (Holotype).

*Gracillaria consimilella* Frey & Boll, 1876.

*Phalaena cruciella* Goeze, 1783.

*Tinea equestris* de Fourcroy, 1785.

*Gracillaria ochracea* Haworth, 1828.

*Gracillaria purpurea* Haworth, 1828.

*Gracillaria purpuriella* Chambers, 1872.

*Tinea triangulella* Panzer, 1794.

*Tinea triangolosella* Costa, 1836.

*Gracillaria trigona* Haworth, 1828.

*Tinea upupaepennella* Hübner, 1791.

**Distribution.** Korea, China, Japan, Russia, Mongolia, India, Armenia, Austria, Belgium, Bosnia and Herzegovina, Bulgaria, Croatia, Czech Republic, Estonia, Finland, France, Georgia, Germany, Hungary, Ireland, Italy, Kyrgyzstan, Latvia, Liechtenstein, Lithuania, Luxembourg, Macedonia, Morocco, Netherlands, Norway, Poland, Portugal, Romania, Serbia, Slovakia, Spain, Sweden, Switzerland, Tajikistan, Turkey, Turkmenistan, Ukraine, Uzbekistan, United Kingdom, Canada, United states.

**Host plants.** *Populus* sp., *P. nigra*, *P. alba* L., *P. sp.*, *Salix bakko* Kimura, *Salix miyabeana* (Seemen), *S. sp.*, *S. lanata* L., *S. pedicellata* Desf., *S. triandra* L., *S. fragilis* L., *S. purpurea* L., *S. atrocinerea* Brot., *S. salviifolia* Brot., *S. longifolia* Lam., *S. repens* L., *S. caprea* L., *S. sachalinensis* Schmidt & Sekka, *S. alba* L., *S. eleagnos* Scop., *S. cinerea* L., *S. incanaeleagnos* Scop [Salicaceae], *Robinia pseudacacia* L. [Fabaceae], *Myrica gale* L., [Myricaceae].

### 25. *Caloptilia syrphetias* (Meyrick, 1907) 후박나무가는나방

*Gracilaria syrphettias* Meyrick, 1907: 984. TL: Ceylon, Sri Lanka. TD: NHMUK.

*Gracilaria zopherotarsa*: Meyrick, 1936: 39.

*Caloptilia perseella*: Kumata, 1982: 93.

**Distribution.** Korea (Jeju Island), Brunei Darussalam, China, Hong Kong, India, Indonesia, Japan, Malaysia, Sri Lanka, Thailand.

**Host plants.** *Machilus thunbergii* Siebold et Zucc. [Lauraceae].

## 26. *Caloptilia theivora* (Walsingham, 1891) 동백가는나방

*Gracillaria theivora* Walsingham, 1891: 49-50. TL: Ceylon, Sri Lanka. TD: BMNH (Lectotype; Paralectotype).

*Caloptilia theivora*: Issiki, 1950

**Distribution.** Korea, China, Hong Kong, Japan, Brunei Darussalam, India, Indonesia, Malaysia, Sri Lanka, Taiwan, Thailand, Viet Nam.

**Host plants.** *Camellia sinensis* L., *C. japonica* L., *C. sasanqua* Thunb., *Thea sinensis* L., *C. theifera* Griff., [Theaceae].

**Remarks.** This species reared from *Camellia sinensis* L. of the family Theaceae in this study.

## 27. *Caloptilia xanthos* Kim and Byun, 2022 노랑점가는나방

*Caloptilia xanthos* Kim and Byun, 2022. TL: Muan-gun, Korea. TD: HNUSEL (Holotype).

**Distribution.** Korea (endemic).

**Host plants.** Unknown.

## 28. *Caloptilia yasudai* Kumata, 1982 노란이빨가는나방

*Caloptilia yasudai* Kumata, 1982: 51-53. TL: Hokkaido, Japan. TD: EIHU (Holotype; Paratypes).

**Distribution.** Korea, Japan.

**Host plants.** Unknown.

**Remarks.** This species cannot be examined in this study.

## 29. *Caloptilia zachrysa* (Meyrick, 1907) 사과잎가는나방

*Gracillaria zachrysa* Meyrick, 1907: 983. TL: Ceylon, Sri Lanka. TD: BMNH (Syntypes).

*Caloptilia zachrysa*: Issiki, 1957.

**Distribution.** Korea, China, Japan, India, Sri Lanka, Taiwan.

**Host plants.** *Malus pumila* Mill., *M. pumila* Mill., *M. sylvestris* Mill., *Prunus persica* (L.) Batsch, *Photinia*

*glabra* (Thunb.) Maxim., *Ph.* sp., *Rubus* sp. [Rosaceae].
